# Supplementary material for: Optimized Copper-Based Microfeathers for Glucose Detection
Source: MDPI journal article supplement (doi:10.3390/bios13121032), 2023-12-15
Supplement: s1 [file s1]

# Supplementary Material

## Optimized copper based microfeathers for glucose detection

Carlota Guati<sup>1\*</sup>, Lucía Gomez-Coma<sup>1</sup>, Marcos Fallanza<sup>1</sup> and Inmaculada Ortiz<sup>1</sup>

*Chemical and Biomolecular Engineering Department, University of Cantabria, 39005 Santander, Spain;*

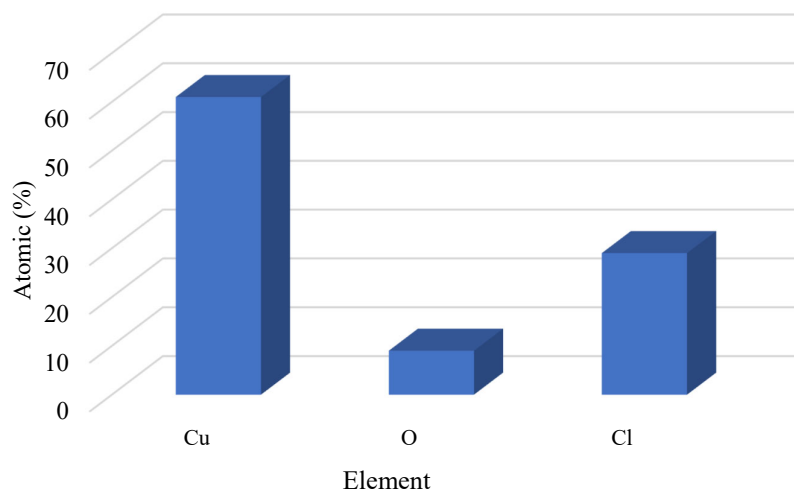

**Figure S1.** Atomic presence in the microfeather electrode

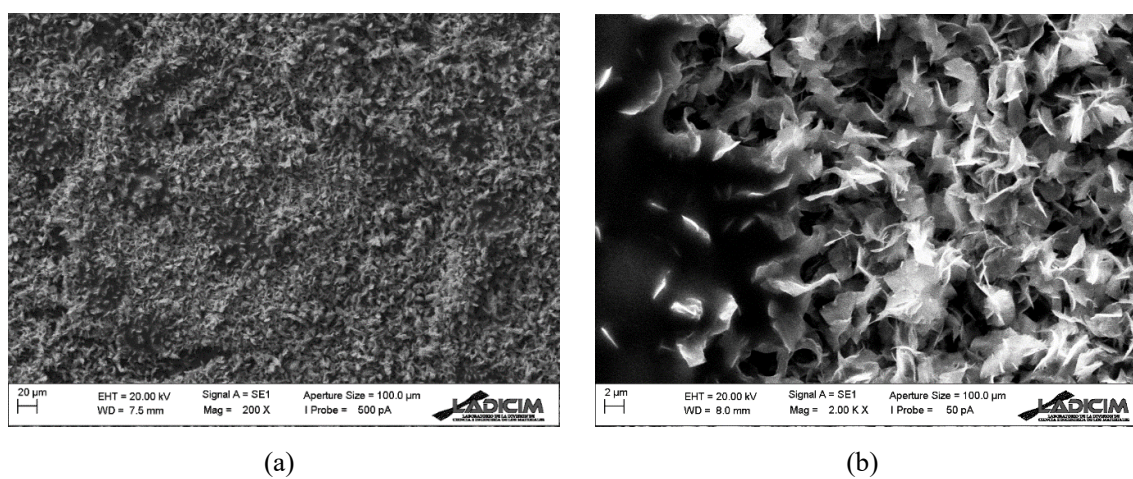

**Figure S2.** SEM images; (a) 200× and (b) 2000×

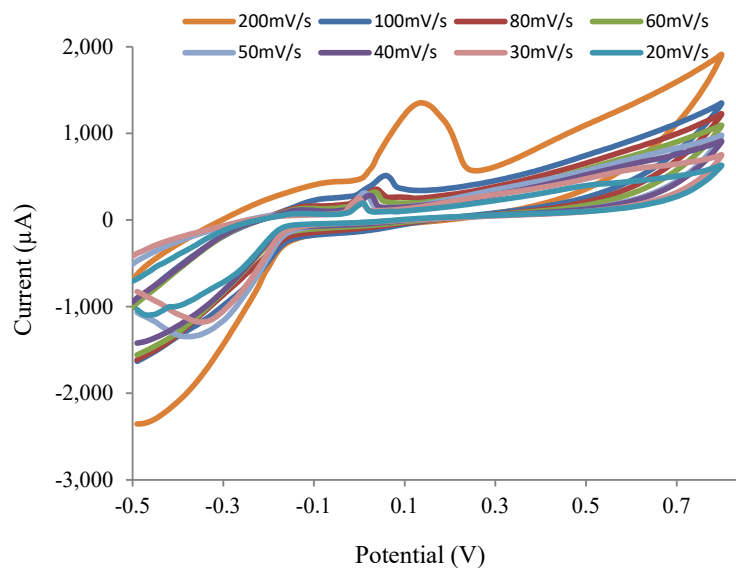

**Figure S3.** Cyclic voltammetry using 5 mM  $\text{Ru}(\text{NH}_3)_6\text{Cl}_3$  in 0.1M KCl with a scan range from 200 to 20  $\text{mV s}^{-1}$

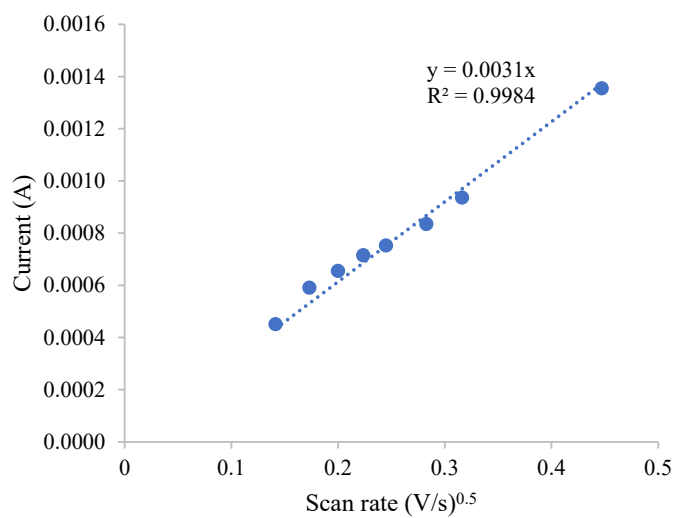

**Figure S4.** Linear regression of the Randles–Sevcik equation

**Table S1.** Three Level Orthogonal Array. Ross, P. J. Taguchi Techniques for Quality Engineering. 2nd edn. Edit-ed by McGraw-Hill. 1996

| Trial no. | Column no. |   |   |   |
|-----------|------------|---|---|---|
|           | 1          | 2 | 3 | 4 |
| 1         | 1          | 1 | 1 | 1 |
| 2         | 1          | 2 | 2 | 2 |
| 3         | 1          | 3 | 3 | 3 |
| 4         | 2          | 1 | 2 | 3 |
| 5         | 2          | 2 | 3 | 1 |
| 6         | 2          | 3 | 1 | 2 |
| 7         | 3          | 1 | 3 | 2 |
| 8         | 3          | 2 | 1 | 3 |
| 9         | 3          | 3 | 2 | 1 |
